# Supplementary material for: High Immobilization Efficiency of Basic Protein within Heparin-Immobilized Calcium Phosphate Nanoparticles
Source: MDPI journal article supplement (doi:10.3390/ijms231911530), 2022-09-29
Supplement: s1 [file s1]

# **High Immobilization Efficiency of Basic Protein within Heparin-immobilized Calcium Phosphate Nanoparticles**

Maki Nakamura <sup>1,\*</sup>, Wakako Bunryo <sup>1</sup>, Aiko Narazaki <sup>2</sup> and Ayako Oyane <sup>1</sup>

<sup>1</sup> *Nanomaterials Research Institute, National Institute of Advanced Industrial Science and Technology (AIST), Central 5, 1-1-1 Higashi, Tsukuba, Ibaraki 305-8565, Japan.*

<sup>2</sup> *Research Institute for Advanced Electronics and Photonics, National Institute of Advanced Industrial Science and Technology (AIST), Central 2, 1-1-1 Umezono, Tsukuba, Ibaraki 305-8568, Japan.*

\*Corresponding author: Maki Nakamura

E-mail: [ma-ki-nakamura@aist.go.jp](mailto:ma-ki-nakamura@aist.go.jp); Tel: +81-29-861-4604

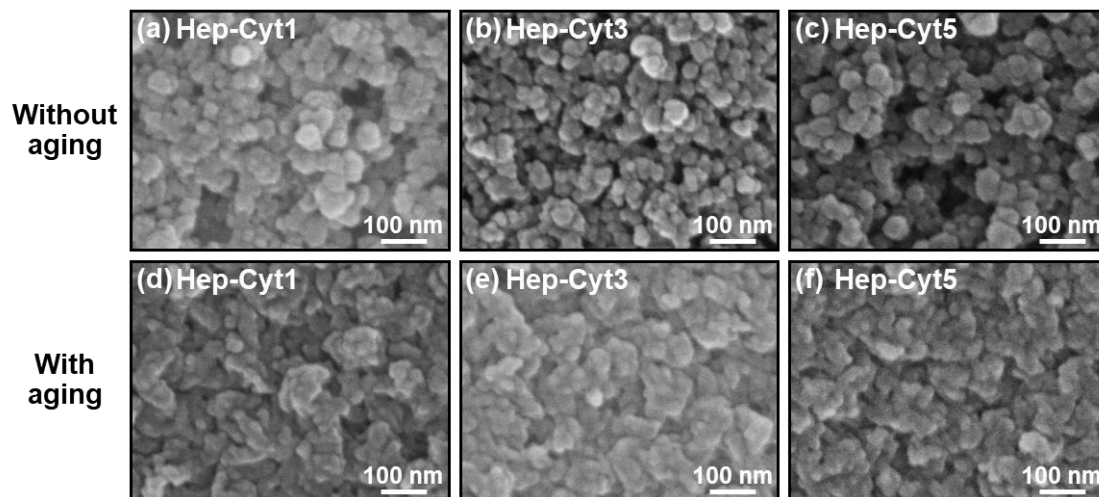

**Figure S1.** SEM images of the products: **Hep-Cyt1**, **Hep-Cyt3**, and **Hep-Cyt5** with (d–f) and without (a–c) aging.

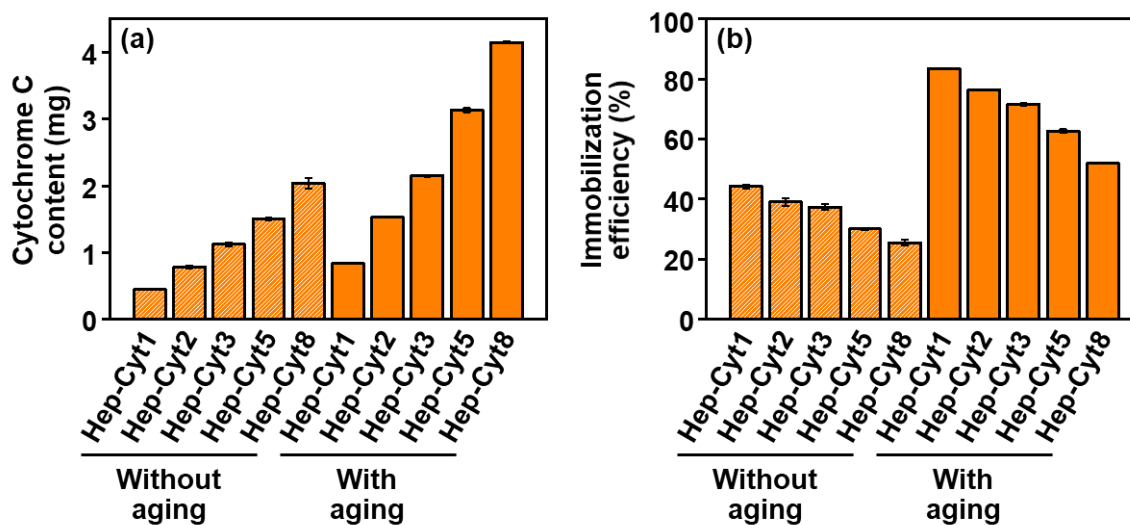

**Figure S2.** Contents (a) and immobilization efficiencies (b) of cytochrome C in the nanoparticles: **Hep-Cyt1**, **Hep-Cyt2**, **Hep-Cyt3**, **Hep-Cyt5**, and **Hep-Cyt8** with and without aging (average  $\pm$  standard error, N = 3).

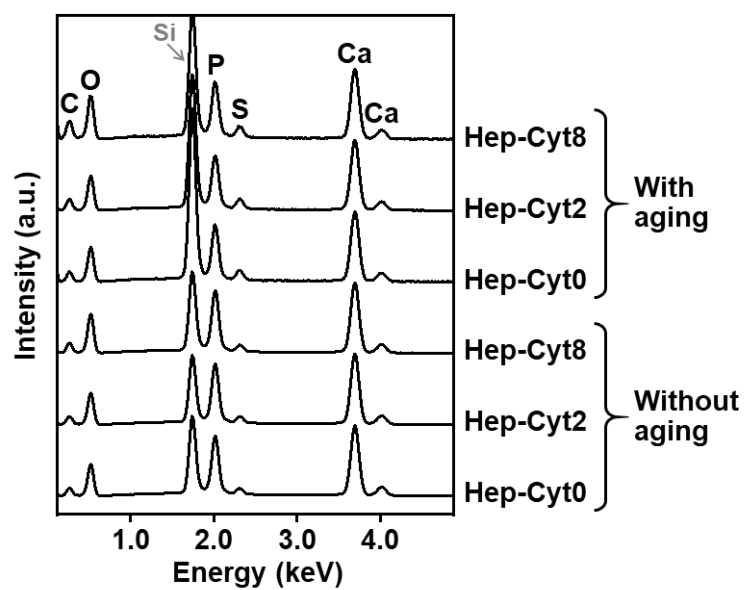

**Figure S3.** EDX spectra of the nanoparticles: **Hep-Cyt0**, **Hep-Cyt2**, and **Hep-Cyt8** with and without aging. The peak for Si was attributed to the silicon substrate used for mounting the nanoparticles.

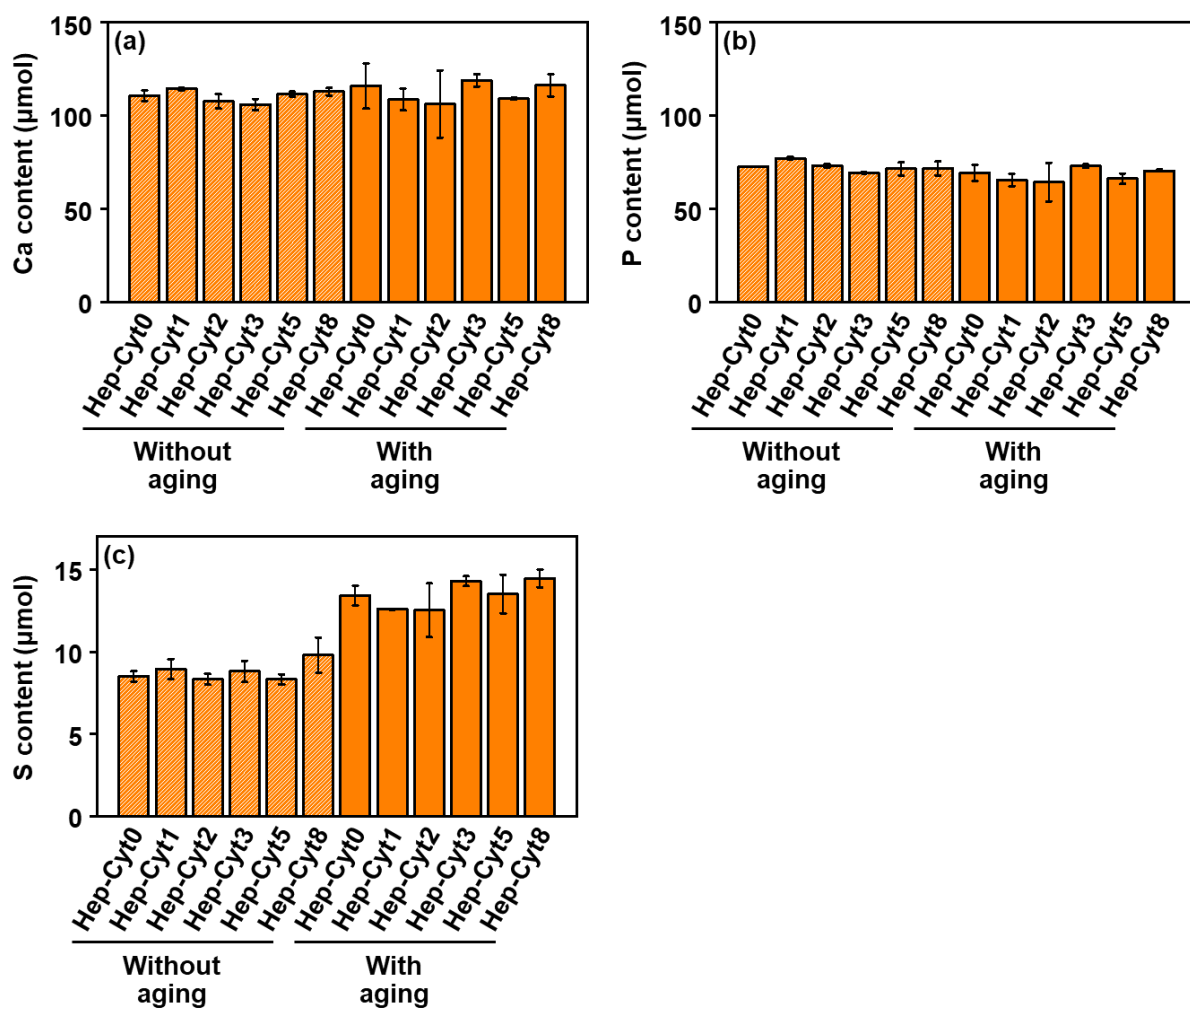

**Figure S4.** Contents of Ca (a), P (b), and S (c) in the nanoparticles: **Hep-Cyt0**, **Hep-Cyt1**, **Hep-Cyt2**, **Hep-Cyt3**, **Hep-Cyt5**, and **Hep-Cyt8** with and without aging (average  $\pm$  standard error,  $N = 2$ ).

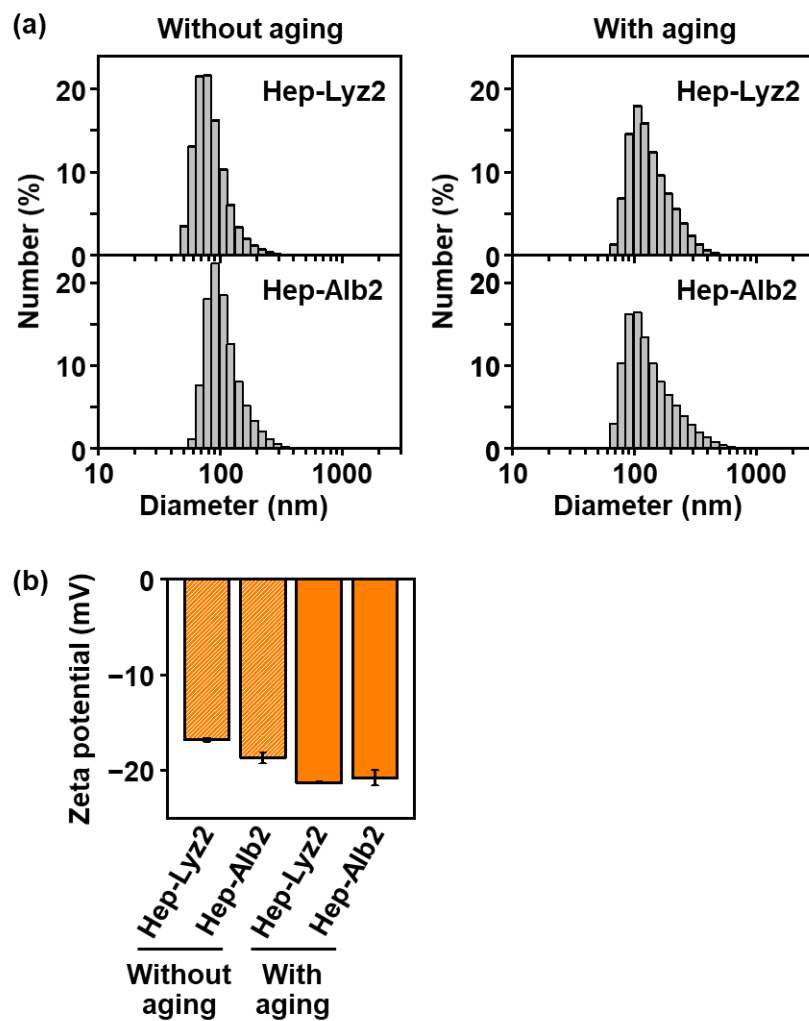

**Figure S5.** DLS histograms of number distributions (a) and zeta potentials (b) of the nanoparticles: **Hep-Lyz2** and **Hep-Alb2** with and without aging. The nanoparticles were dispersed in water.
